# Supplementary material
Source: publisher site journal article supplement (https://www.dovepress.com/article/450337)
Supplement: Supplementary file 1 [file get_supplementary_file.php]

**Supplementary TABLE 1** | Primary Antibodies.

| **Antibody Source Dilution** |
| --- |
| | Mouse anti- F4/80 | HY-P80665, MCE | IF: 1:100 | | --- | --- | --- | | Mouse anti-insulin | 66198-1-Ig, proteintech | IF: 1:100 | | Rabbit anti-insulin | 15848-1-AP, proteintech | IF: 1:100 | | Rabbit anti-glucagon | Ab92517, Abcam | IF: 1:100 | | Rabbit anti-CD 206 | ARG22372, arigobio | IF: 1:100 | | Rabbit anti-CD 86 | GTX32507, GeneTex | IF: 1:100 | | Rabbit anti-ACE2 | NBP2-67692, Novus | IF: 1:100  WB: 1:1000 | | Rabbit anti-NLRP3 | GB114320, Servicebio | IF: 1:100  WB: 1:1000 | | Rabbit anti-PDX1 | #5679, CST | IF: 1:100  WB: 1:1000 | | Rabbit anti-NKX6.1 | NBP1-49672SS, Novus | IF: 1:100  WB: 1:1000 | | Rabbit anti-NFκB | TA5006, Abmart | WB: 1:1000 | | Rabbit anti-p-NFκB | T55034, Abmart | WB: 1:1000 | | Rabbit anti-IκBα | T55026, Abmart | WB: 1:1000 | | Rabbit anti-p-IκBα | TP56280, Abmart | WB: 1:1000 | | Rabbit anti-CD 9 | HY-P80068, MCE | WB: 1:1000 | | Rabbit anti-TSG 101 | HY-P80924, MCE | WB: 1:1000 | | Rabbit anti-ALIX | T57215, Abmart | WB: 1:1000 | | Rabbit anti-Bax | T40051,Abmart | WB: 1:1000 | | Rabbit anti-Bcl2 | T40056,Abmart | WB: 1:1000 | | Rabbit anti-Cleaved Caspase 3 | TA7022, Abmart | WB: 1:1000 | | Rabbit anti-Caspase 3  Rabbit anti-ASC | TA6311, Abmart  GB113966, Servicebio | WB: 1:1000  WB: 1:1000 | | Rabbit anti-IL1β | Ab283818, Abcam | WB: 1:1000  IF: 1:100 | | Mouse anti-Caspase 1 | M025280, Abmart | WB: 1:1000 | | Rabbit anti-GSDMD | TA4012, Abmart | WB: 1:1000 | | Rabbit anti-GSDMD | #46451, CST | WB: 1:1000 | | Mouset anti-18 | M027287, Abmart | WB: 1:1000 | | Rabbit anti-IL1β | TA5103, Abmart | WB: 1:1000 | | Rabbit anti-FOXO1 | #2880, CST | WB: 1:1000 | | Rabbit anti-Mas | NBP1-78444, Novus | WB: 1:1000 | | Mouse anti-β-actin | 66009-1-lg, Proteintech | WB: 1:1000 | | Mouse anti-GAPDH | 60004-1-Ig, Proteintech | WB: 1:1000 | |

**Supplementary TABLE 2**

List of primers used for real-time PCR using SYBR-Green.

| Gene Forward sequence(5′to3′) Reverse sequence (5′to3′) |
| --- |
| | PDX1 | TCCACCACCACCTTCCAGCTCA | | AATTCCTTCTCCAGCTCCAG | | --- | --- | --- | --- | | NKX6.1 | | ACAAACCTCTGGACCCGAAC | AATAGTAAAGGCCCGGCGAG | | FOXO1 | | CAGGACAGCAAATCAAGTTACGG | CCAAGGTATCTCCATCCATGAGG | | MAFA | | GAGGAGGTCATCCGACTGAAA | GCACTTCTCGCTCTCCAGAAT | | ACE2 | | ATCTGTACCCTTTGACTGTTCCC | AGTCATATGAGGAAGGCCAACAG | | Bcl-2 | | GCTACCGTCGTGACTTCGC | CCCCACCGAACTCAAAGAAGG | | Bax | | AGGATGCGTCCACCAAGAAGCT | TCCGTGTCCACGTCAGCAATCA | | NFΚB | | TACCCGAAACTCAACTTCTGTCC | TTGAGATCTGCCCTGATGGTAAC | | Caspase-3 | | TGGTGATGAAGGGGTCATTTATG | TTCGGCTTTCCAGTCAGACTC | | Caspase-1 | | ACTCGTACACGTCTTGCCCTCA | CTGGGCAGGCAGCAAATTC | | IL1β | | CAAAGTGGAGTTTGAGTCTGCAG | TTAGGAAGACACGGATTCCATGG | | NLRP3 | | AGATGAAGGACCCACAGTGTAAC | AGGGCATTGCTTCGTAGATAGAG | | GSDMD | | CCTGGGTCTTGCTAGAAGAATGT | CAAGGTTTCTGGCCTAGACTTGA | | IL18 | | TGACCCTCTCTGTGAAGGATAGT | GTCCTGGAACACGTTTCTGAAAG | | ASC | | GTTCAAGATGAAGCTGCTGACAG | GCCATACGACTCCAGATAGTAGC | | β-actin | | ATTGTTACCAACTGGGACG | CTGGGTCATCTTTTCACG | |


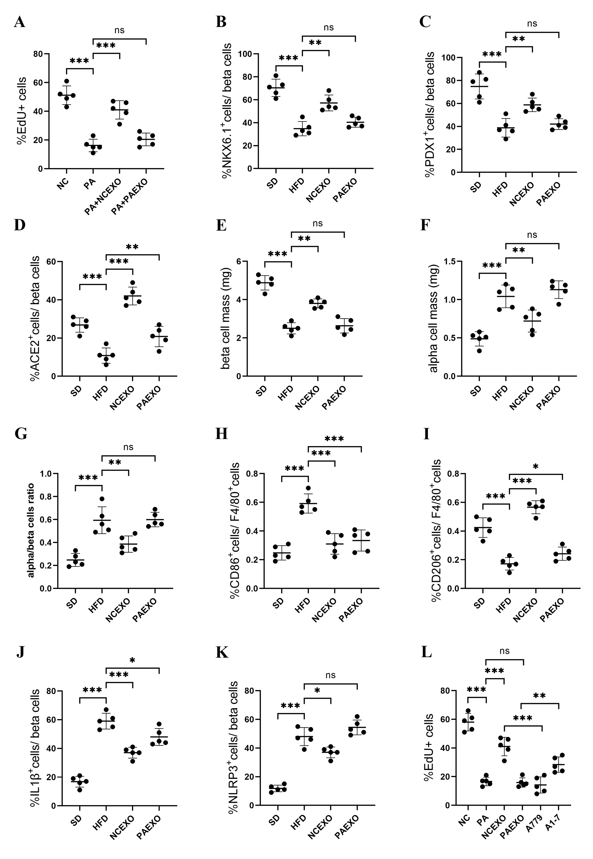


Supplementary Figure 1. (A) EdU+ cell count analysis. (B-D) The ratio of NKX6.1, PDX1, ACE2 immunopositive cells. Assessment of the (E) pancreatic islets β-cell mass, (F) pancreatic islets α-cell mass, (G) α/β-cell ratio. (H-K) The ratio of CD86, CD206, IL1β, NLRP3 immunopositive cells. (L) EdU+ cell count analysis. *P < 0.05, **P < 0.01 and ***P < 0.001


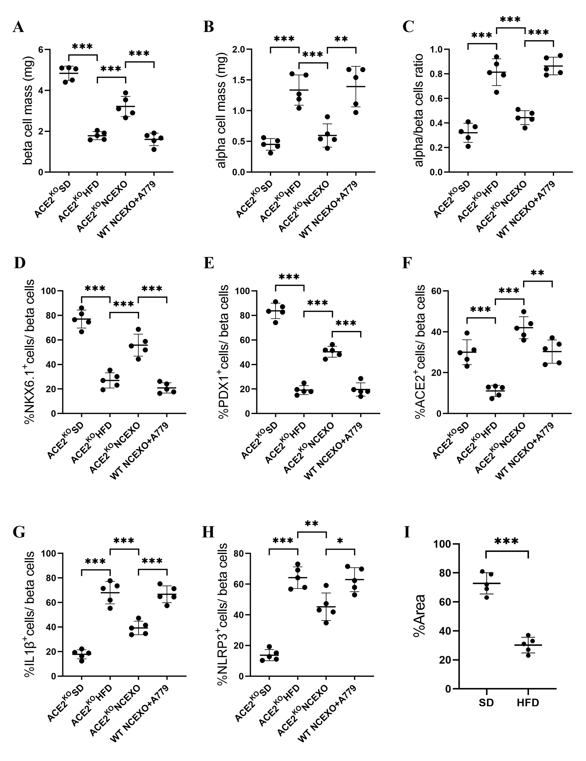


Supplementary Figure 2. Assessment of the (A) pancreatic islets β-cell mass, (B) pancreatic islets α-cell mass, (C) α/β-cell ratio. (D-H) The ratio of NKX6.1, PDX1, ACE2, IL1β, NLRP3 immunopositive cells. (I) The average optical density of ACE2+ immunopositive cells. *P < 0.05, **P < 0.01 and ***P < 0.001


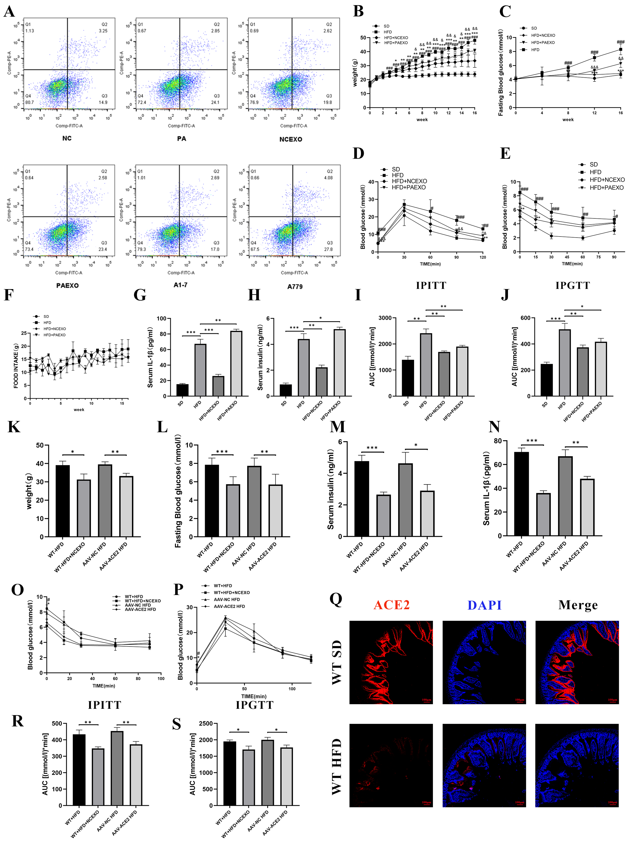


Supplementary Figure 3. Early preventative treatment of NCEXO improves the metabolic status of HFD mice. (A) Flow cytometry was used to quantify rates of apoptosis in treated cells. (B) Body weight. (C) FBG. (D) IPITT and (E) IPGTT. ( #P < 0.05, ##P < 0.01 and ###P < 0.001 HFD group vs SD group; *P < 0.05, **P < 0.01 and ***P < 0.001 NCEXO group vs HFD group; &P < 0.05,&&P < 0.01 and &&&P < 0.001 PAEXO group vs HFD group in (B)(C)(D)(E)). (F) Food intake of experimental mice. (G) IL-1β and (H) Serum insulin were measured by Elisa Kits. AUC of IPITT(I) and IPGTT(J). (K) Body weight, (L) FBG, (M) Serum insulin and (N) IL-1β, (O) IPITT and (P) IPGTT of ACE2 overexpressed mice at week 16 after fasting overnight. (Q) Representative images of ACE2 in the mouse small intestinal. Bar = 100μm. AUC of IPITT(R) and IPGTT (S). *P < 0.05, **P < 0.01 and ***P < 0.001
